# Supplementary material
Source: PubMed Central journal article supplement (PMC5757081)
Supplement: Supp_Data.pdf [file Supp_Data.pdf]

## Supplementary Data

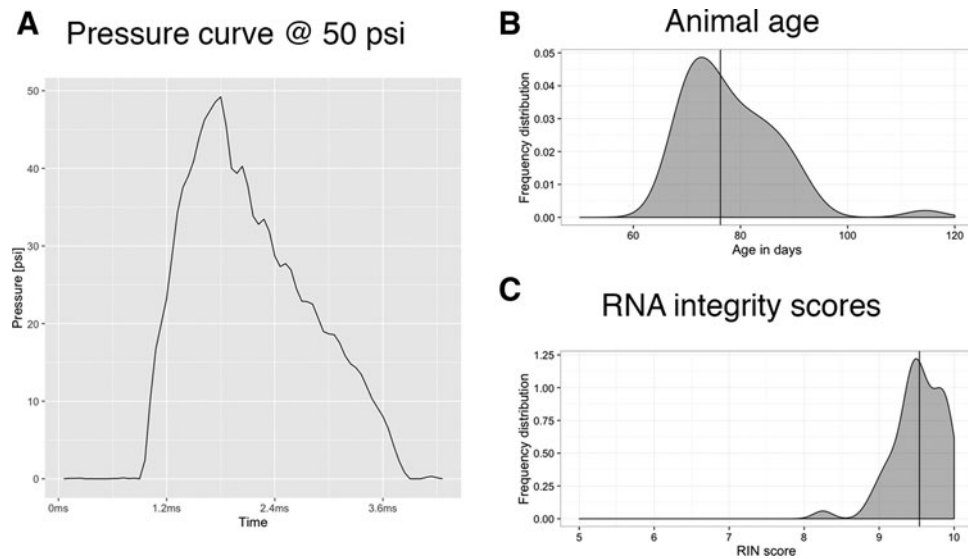

**SUPPLEMENTARY FIG. 1.** (A) A typical pressure curve produced by the blast gun. (B) Distribution of animal age for blast samples. (C) Distribution of ribonucleic acid (RNA) integrity number (RIN) scores for blast samples. The vertical line in (B) and (C) represents the median.

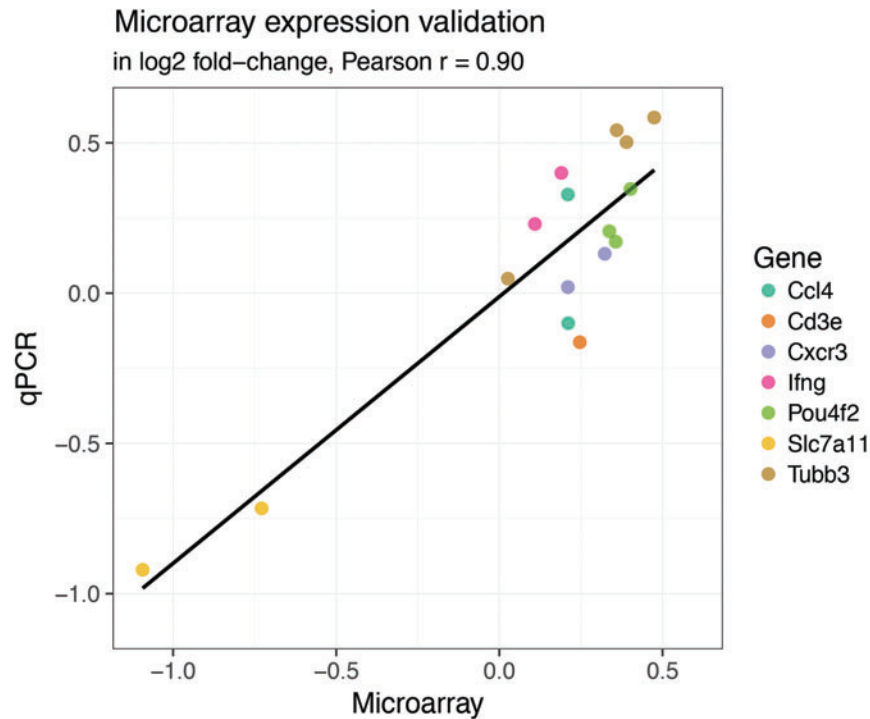

| Gene    | Strain | Microarray FC | qPCR FC |
|---------|--------|---------------|---------|
| Cd3e    | BXD27  | 0.246         | -0.163  |
| Tubb3   | BXD27  | 0.026         | 0.048   |
| Pou4f2  | BXD42  | 0.337         | 0.206   |
| Tubb3   | BXD42  | 0.360         | 0.542   |
| Slc7a11 | BXD75  | -1.093        | -0.921  |
| Pou4f2  | BXD75  | 0.357         | 0.171   |
| Tubb3   | BXD75  | 0.390         | 0.502   |
| Slc7a11 | BXD85  | -0.728        | -0.716  |
| Pou4f2  | BXD85  | 0.402         | 0.347   |
| Tubb3   | BXD85  | 0.474         | 0.584   |
| Cxcr3   | B6     | 0.323         | 0.131   |
| Ccl4    | B6     | 0.210         | 0.328   |
| Ifng    | B6     | 0.190         | 0.400   |
| Cxcr3   | D2     | 0.210         | 0.020   |
| Ccl4    | D2     | 0.211         | -0.100  |
| Ifng    | D2     | 0.109         | 0.230   |

Primers used (5' --> 3')

|             |                        |
|-------------|------------------------|
| Slc7a11 fw  | GGTGTGTAATGATAGGGCAGCA |
| Slc7a11 rev | CGGTCGTGACTTCCCCTTTG   |
| Cd3e fw     | TCTGGGCTTGCTGATGGTCAT  |
| Cd3e rev    | GTTCTCCTCGGGTCACAGGCTT |
| Ifng fw     | TCAGCAACAGCAAGGCGAAA   |
| Ifng rev    | GCGACTCCTTTTCCGCTTCC   |
| Pou4f2 fw   | TGAACCCAGACCAAGCCAGG   |
| Pou4f2 rev  | GGTGCAGTTAAAGGGGACAGC  |
| Tubb3 fw    | CCTTTTCGTCTCTAGCCGCG   |
| Tubb3 rev   | CCTATCTGGTTGCCGCACTG   |
| Ccl4 fw     | CAAACCTAACCCCGAGCAACA  |
| Ccl4 rev    | GCAGGAAGTGGGAGGGTTCAG  |
| Cxcr3 fw    | ACCAGCCAAGCCATGTACCTT  |
| Cxcr3 rev   | CGTAGGGAGAGGTGCTGTTTT  |

**SUPPLEMENTARY FIG. 2.** Validation of microarray expression data and samples/primers used. qPCR-derived fold changes values were log<sub>2</sub> transformed and plotted against microarray expression data. There is good agreement of qPCR and microarray data (Pearson's  $r=0.90$ ). PCR, polymerase chain reaction.

Normal

Blast

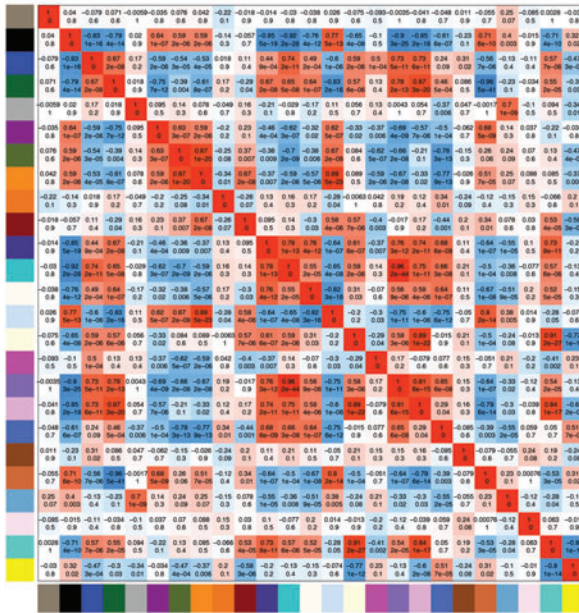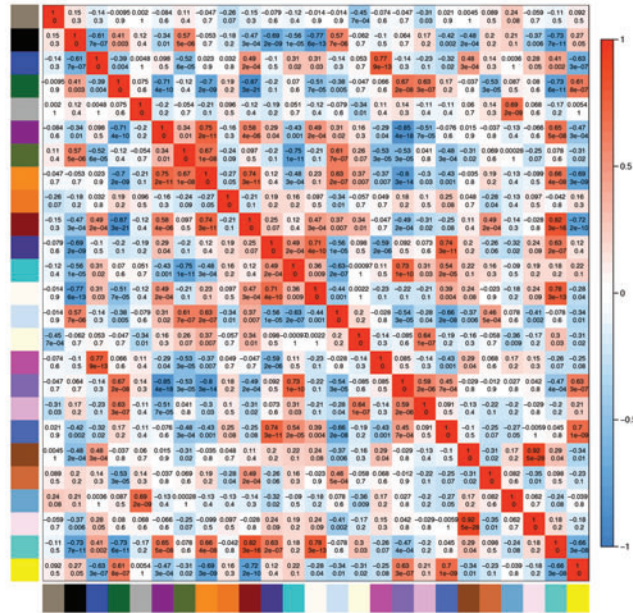

Module Eigengene preservation

Module Eigengene correlation: blast vs. normal

D=0.86

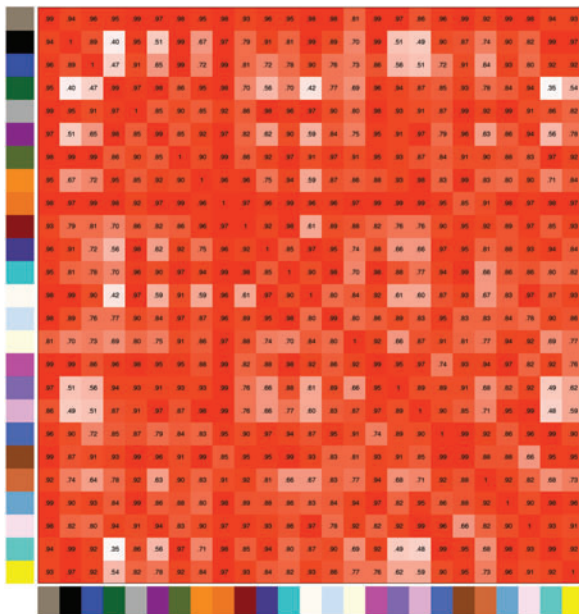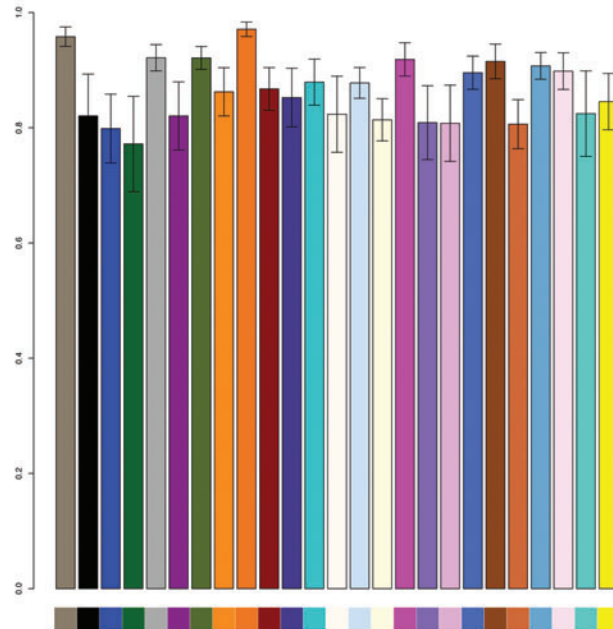

**SUPPLEMENTARY FIG. 3.** Top: Correlation matrices of weighted gene co-expression network analysis (WGCNA) modules identified for the blast and normal datasets. The colors on the x- and y-axis represent the module. Bottom left: Module eigengene preservation between both conditions. Lower values indicate higher intermodular changes. Bottom right: Module eigengene correlation between both condition. Lower values indicate stronger intramodular changes between conditions.
